# Supplementary material
Source: PubMed Central journal article supplement (PMC3362144)
Supplement: supp_00596.2011_tableS1.pdf [file supp_00596.2011_tableS1.pdf]

**Table S1: Ratio of Heart/Liver Content for Selected Mitochondrial Proteins**

| Pig (n=3)                                                                             |                                | Mouse (n=4)                                                                           |                               |
|---------------------------------------------------------------------------------------|--------------------------------|---------------------------------------------------------------------------------------|-------------------------------|
| Proteins (accession)                                                                  | Heart/Liver (mean (SD))        | Proteins (accession)                                                                  | Heart /Liver (mean (SD))      |
| Complex I: Summary                                                                    | 3.7 (1.0) range 2.1-6.4        | Complex I: Summary                                                                    | 4.1(1.3) range 1.4-6.9        |
| Complex II (ETF) summary                                                              | 1.4(0.5) range 0.9-2.0         | Complex II (ETF)summary                                                               | 2.9(0.4) range 2.5-3.6        |
| Complex III Summary                                                                   | 4.8(0.7) range 4.0-6.2         | Complex III Summary                                                                   | 3.4 (0.5) range 2.6-4.0       |
| Complex IV Summary                                                                    | 4.5 (1.4) range 3.3-7.6        | Complex IV Summary                                                                    | 3.1(1.3) range 1.3-5.3        |
| Complex V Summary                                                                     | 3.8(0.9) range 2.9-6.3         | Complex V Summary                                                                     | 3.2(0.8) range 2.4-5.0        |
| ADP and Pi Transport: Summary                                                         | 4.7(0.8) range 4.1-5.6         | ADP and Pi Transport: Summary                                                         | 2.9 (2.5) range 0.5-5.6       |
| Citric Acid Cycle Summary                                                             | 4.1(1.5) range 1.8-6.1         | Citric Acid Cycle Summary                                                             | 4.7(0.9) range 3.9-7.0        |
| <b>Complex I: Summary</b>                                                             |                                |                                                                                       |                               |
|                                                                                       | <b>3.7 (1.0) range 2.1-6.4</b> | <b>Complex I: Summary</b>                                                             | <b>4.1(1.3) range 1.4-6.9</b> |
| (Q02370) NADH dehydrogenase [ubiquinone] 1 alpha subcomplex subunit 2                 | 3.5(0.1)                       | (Q9CQ75) NADH dehydrogenase [ubiquinone] 1 alpha subcomplex subunit 2                 | 4.1(0.4)                      |
| (P17694) NADH dehydrogenase [ubiquinone] iron-sulfur protein 2, mitochondrial         | 3.6(0.3)                       |                                                                                       |                               |
| (O75489) NADH dehydrogenase [ubiquinone] iron-sulfur protein 3, mitochondrial         | 2.9(0.4)                       |                                                                                       |                               |
| (O00483)NADH dehydrogenase [ubiquinone] 1 alpha subcomplex subunit 4                  | 3.4(0.7)                       | (Q62425) NADH dehydrogenase [ubiquinone] 1 alpha subcomplex subunit 4                 | 5(0.7)                        |
| (O95299) NADH dehydrogenase [ubiquinone] 1 alpha subcomplex subunit 10, mitochondrial | 3.0(0.5)                       | (Q99LC3) NADH dehydrogenase [ubiquinone] 1 alpha subcomplex subunit 10, mitochondrial | 3.1(0.9)                      |
| (O97725) NADH dehydrogenase [ubiquinone] 1 alpha subcomplex subunit 12                | 3.4(1.0)                       | (Q7TMF3) NADH dehydrogenase [ubiquinone] 1 alpha subcomplex subunit 12                | 6.9(0.5)                      |
| (Q9P0J0) NADH dehydrogenase [ubiquinone] 1                                            | 3.1(0.8)                       | (Q9ERS2) NADH dehydrogenase [ubiquinone] 1 alpha subcomplex subunit                   | 2.5(0.7)                      |

|                                                                                      |           |                                                                                      |          |
|--------------------------------------------------------------------------------------|-----------|--------------------------------------------------------------------------------------|----------|
| alpha subcomplex subunit 13                                                          |           | 13                                                                                   |          |
| (Q02365) NADH dehydrogenase [ubiquinone] 1 beta subcomplex subunit 3                 | 4.4(0.9)  |                                                                                      |          |
| (Q02367) NADH dehydrogenase [ubiquinone] 1 beta subcomplex subunit 6                 | 4.5(1.0)  | (Q3UIU2) NADH dehydrogenase [ubiquinone] 1 beta subcomplex subunit 6                 | 3.1(0.3) |
| (Q02368) NADH dehydrogenase [ubiquinone] 1 beta subcomplex subunit 7                 | 2.7(0.2)  | (Q9CR61) NADH dehydrogenase [ubiquinone] 1 beta subcomplex subunit 7                 | 3.9(0.3) |
| (Q16795) NADH dehydrogenase [ubiquinone] 1 alpha subcomplex subunit 9, mitochondrial | 4.25(0.5) | (Q9DC69) NADH dehydrogenase [ubiquinone] 1 alpha subcomplex subunit 9, mitochondrial | 3.0(0.6) |
| (P04394) NADH dehydrogenase [ubiquinone] flavoprotein 2, mitochondrial               | 3.7(0.1)  | (Q9D6J6) NADH dehydrogenase [ubiquinone] flavoprotein 2, mitochondrial               | 3.5(0.2) |
| (O95182) NADH dehydrogenase [ubiquinone] 1 alpha subcomplex subunit 7                | 5.5(0.3)  | (Q9Z1P6) NADH dehydrogenase [ubiquinone] 1 alpha subcomplex subunit 7                | 6.3(1.7) |
| (Q02373) NADH dehydrogenase [ubiquinone] 1 beta subcomplex subunit 10                | 2.8(0.4)  | (Q9DCS9) NADH dehydrogenase [ubiquinone] 1 beta subcomplex subunit 10                | 3.8(0.8) |
| (P15690) NADH-ubiquinone oxidoreductase 75 kDa subunit, mitochondrial                | 3.8(0.1)  | (Q91VD9) NADH-ubiquinone oxidoreductase 75 kDa subunit, mitochondrial                | 3.8(0.3) |
| (Q02375) NADH dehydrogenase [ubiquinone] iron-sulfur protein 4, mitochondrial        | 6.4(0.6)  | (Q9CXZ1) NADH dehydrogenase [ubiquinone] iron-sulfur protein 4, mitochondrial        | 2.7(0.2) |
| (P23934) NADH dehydrogenase [ubiquinone] iron-sulfur protein 6, mitochondrial        | 2.1(0.1)  | (P52503) NADH dehydrogenase [ubiquinone] iron-sulfur protein 6, mitochondrial        | 2.6(0.3) |
| (O75251) NADH dehydrogenase [ubiquinone] iron-sulfur protein 7, mitochondrial        | 3.6(0.2)  | (Q9DC70) NADH dehydrogenase [ubiquinone] iron-sulfur protein 7, mitochondrial        | 3.0(0.8) |
| (P25708) NADH dehydrogenase [ubiquinone] flavoprotein 1, mitochondrial               | 3.5(0.2)  | (Q91YT0) NADH dehydrogenase [ubiquinone] flavoprotein 1, mitochondrial               | 3.6(1.2) |
|                                                                                      |           | (Q9CQZ5) NADH dehydrogenase [ubiquinone] 1 alpha subcomplex subunit 6                | 5.8(1.4) |
|                                                                                      |           | (Q9DCJ5) NADH dehydrogenase [ubiquinone] 1 alpha subcomplex subunit 8                | 4.1(1.3) |
|                                                                                      |           | (Q9CQJ8) NADH dehydrogenase [ubiquinone] 1 beta subcomplex subunit 9                 | 6.2(0.3) |
|                                                                                      |           | (O09111) NADH dehydrogenase [ubiquinone] 1 beta subcomplex subunit 11, mitochondrial | 4.7(1.2) |
|                                                                                      |           | (Q9CQ54) NADH dehydrogenase [ubiquinone] 1 subunit C2                                | 1.6(0.1) |
|                                                                                      |           | (Q91WD5) NADH dehydrogenase [ubiquinone] iron-sulfur protein 2, mitochondrial        | 4.3(0.9) |

|                                                                                   |                                |                                                                                   |                                |
|-----------------------------------------------------------------------------------|--------------------------------|-----------------------------------------------------------------------------------|--------------------------------|
|                                                                                   |                                | (Q9DCT2) NADH dehydrogenase [ubiquinone] iron-sulfur protein 3, mitochondrial     | 5.2(0.3)                       |
|                                                                                   |                                | (Q8K3J1) NADH dehydrogenase [ubiquinone] iron-sulfur protein 8, mitochondrial     | 5.6(1.6)                       |
| <b>Complex II (ETF) summary</b>                                                   | <b>1.4(0.5) range 0.9-2.0</b>  | <b>Complex II (ETF)summary</b>                                                    | <b>2.9(0.4) range 2.5-3.6</b>  |
| (P13804) Electron transfer flavoprotein subunit alpha, mitochondrial              | 0.92(0.1)                      | (Q99LCS) Electron transfer flavoprotein subunit alpha                             | 2.7(0.5)                       |
| (Q6UQAQ8) Electron transfer flavoprotein subunit beta                             | 0.9(0.1)                       | (Q9DCW4) Electron transfer flavoprotein subunit beta                              | 2.7(0.5)                       |
| (P55931) Electron transfer flavoprotein-ubiquinone oxidoreductase, mitochondrial  | 1.4(0.1)                       | (Q921G7) Electron transfer flavoprotein-ubiquinone oxidoreductase, mitochondrial  | 3.0(0.5)                       |
| (Q007T0) Succinate dehydrogenase [ubiquinone] iron-sulfur subunit, mitochondria   | 1.9(0.02)                      | (Q9CQA3) Succinate dehydrogenase [ubiquinone] iron-sulfur subunit, mitochondrial  | 2.5(0.4)                       |
| (Q0QF01) Succinate dehydrogenase [ubiquinone] flavoprotein subunit, mitochondrial | 2.0(0.3)                       | (Q8K2B3) Succinate dehydrogenase [ubiquinone] flavoprotein subunit, mitochondrial | 3.6(0.8)                       |
| <b>Complex III Summary</b>                                                        | <b>4.8(0.7) range 4.0-6.2</b>  | <b>Complex III Summary</b>                                                        | <b>3.4 (0.5) range 2.6-4.0</b> |
| (P62894) Cytochrome c                                                             | 6.2 (0.8)                      |                                                                                   |                                |
| (P31800) Cytochrome b-c1 complex subunit 1, mitochondrial                         | 4.4(0.2)                       | (Q9CZ13) Cytochrome b-c1 complex subunit 1, mitochondrial                         | 3.5(0.4)                       |
| (P23004) Cytochrome b-c1 complex subunit 2, mitochondrial                         | 4.5(0.3)                       | (Q9DB77) Cytochrome b-c1 complex subunit 2, mitochondrial                         | 3.3(0.6)                       |
| (P00125) Cytochrome c1, heme protein, mitochondrial                               | 4.0(1.2)                       | (Q9D0M3) Cytochrome c1, heme protein, mitochondrial                               | 2.6(0.3)                       |
| (P00126) Cytochrome b-c1 complex subunit 6, mitochondrial                         | 5.3(1.0)                       | (P99028) Cytochrome b-c1 complex subunit 6, mitochondrial                         | 3.75(1.0)                      |
| (P00129) Cytochrome b-c1 complex subunit 7                                        | 4.3(0.6)                       | (Q9D855) Cytochrome b-c1 complex subunit 7                                        | 3.0(0.5)                       |
| (P13272) Cytochrome b-c1 complex subunit Rieske, mitochondrial                    | 4.9(0.6)                       | (Q9CR68) Cytochrome b-c1 complex subunit Rieske, mitochondrial                    | 4.0(1.0)                       |
| <b>Complex IV Summary</b>                                                         | <b>4.5 (1.4) range 3.3-7.6</b> | <b>Complex IV Summary</b>                                                         | <b>3.1(1.3) range 1.3-5.3</b>  |

|                                                                  |                               |                                                                  |                               |
|------------------------------------------------------------------|-------------------------------|------------------------------------------------------------------|-------------------------------|
| (P00426) Cytochrome c oxidase subunit 5A, mitochondrial          | 3.6(0.1)                      | (P12787) Cytochrome c oxidase subunit 5A, mitochondrial          | 2.4(0.5)                      |
| (A1XQT2) Cytochrome c oxidase subunit 6C                         | 3.3 (1.2)                     | (Q9CPQ1) Cytochrome c oxidase subunit 6C                         | 2.5(1.2)                      |
| (Q95283) Cytochrome c oxidase subunit 4 isoform 1, mitochondrial | 4.2(1.2)                      | (P19783) Cytochrome c oxidase subunit 4 isoform 1, mitochondrial | 3.8(0.7)                      |
| (Q5S3G4) Cytochrome c oxidase subunit 5B, mitochondrial          | 4.5(0.4)                      | (P19536) Cytochrome c oxidase subunit 5B, mitochondrial          | 5.3(1.4)                      |
| (P00430) Cytochrome c oxidase subunit 7C, mitochondrial          | 4.1(1.4)                      | (P17665) Cytochrome c oxidase subunit 7C, mitochondrial          | 3.1(0.4)                      |
| (P00429) Cytochrome c oxidase subunit 6B1                        | 4.7(0.6)                      |                                                                  |                               |
| (Q8SPJ9) Cytochrome c oxidase subunit 7A1, mitochondrial         | 7.6(2)                        |                                                                  |                               |
|                                                                  |                               | (P00405) Cytochrome c oxidase subunit 2                          | 3.1(0.8)                      |
|                                                                  |                               | (P48771) Cytochrome c oxidase subunit 7A2, mitochondrial         | 1.3(0.3)                      |
| <b>Complex V Summary</b>                                         | <b>3.8(0.9) range 2.9-6.3</b> | <b>Complex V Summary</b>                                         | <b>3.2(0.8) range 2.4-5.0</b> |
| (P19483) ATP synthase subunit alpha, mitochondrial               | 3.2(0.1)                      | (Q03265) ATP synthase subunit alpha, mitochondrial               | 3.7(0.4)                      |
| (P06576) ATP synthase subunit beta, mitochondrial                | 3.2(0.1)                      | (P56480) ATP synthase subunit beta, mitochondrial                | 4.0(0.6)                      |
| (P13618) ATP synthase-coupling factor 6, mitochondrial           | 4.3(0.6)                      | (P97450) ATP synthase-coupling factor 6, mitochondrial           | 5.0(0.6)                      |
| (P05631) ATP synthase subunit gamma, mitochondrial               | 4.0(0.3)                      | (Q91VR2) ATP synthase subunit gamma, mitochondrial               | 2.4(0.6)                      |
| (P13619) ATP synthase subunit b, mitochondrial                   | 3.6(0.5)                      | (Q9CQQ7) ATP synthase subunit b, mitochondrial                   | 2.7(0.5)                      |
| (Q29307) ATPase inhibitor, mitochondrial                         | 6.3(0.5)                      |                                                                  |                               |
| (P56381) ATP synthase subunit epsilon, mitochondrial             | 3.3(0.1)                      |                                                                  |                               |
| (P13620) ATP synthase subunit d, mitochondrial                   | 4.1(1.3)                      |                                                                  |                               |
| (P56385) ATP synthase subunit e,                                 | 2.9(0.3)                      | (Q06185) ATP synthase subunit e,                                 | 2.8(0.3)                      |

|                                                                                         |                               |                                                                                         |                                |
|-----------------------------------------------------------------------------------------|-------------------------------|-----------------------------------------------------------------------------------------|--------------------------------|
| mitochondrial                                                                           |                               | mitochondrial                                                                           |                                |
| (Q28852) ATP synthase subunit g, mitochondrial                                          | 4.0(0.4)                      | (Q9CPQ8) ATP synthase subunit g, mitochondrial                                          | 2.5(0.4)                       |
| (Q2EN81) ATP synthase subunit O, mitochondrial                                          | 3.6(0.2)                      | (Q9DB20) ATP synthase subunit O, mitochondrial                                          | 2.8(0.7)                       |
|                                                                                         |                               | (Q9D3D9) ATP synthase subunit delta, mitochondrial                                      | 3.6(0.6)                       |
|                                                                                         |                               | (P56135) ATP synthase subunit f, mitochondrial                                          | 2.5(0.6)                       |
| <b>ADP and Pi Transport: Summary</b>                                                    | <b>4.7(0.8) range 4.1-5.6</b> | <b>ADP and Pi Transport: Summary</b>                                                    | <b>2.9 (2.5) range 0.5-5.6</b> |
| (P02722) ADP/ATP translocase 1                                                          | 4.3(1.5)                      | (P48962) ADP/ATP translocase 1                                                          | 5.6(0.4)                       |
| (Q8SQH5) ADP/ATP translocase 2                                                          | 4.1(1.3)                      | (P51881) ADP/ATP translocase 2                                                          | 0.5(0.1)                       |
| (P12234) Phosphate carrier protein, mitochondrial                                       | 5.6(2)                        | (Q8VEM8) Phosphate carrier protein, mitochondrial                                       | 2.6(0.3)                       |
| <b>Citric Acid Cycle Summary</b>                                                        | <b>4.1(1.5) range 1.8-6.1</b> | <b>Citric Acid Cycle Summary</b>                                                        | <b>4.7(0.9) range 3.9-7.0</b>  |
| (P00346) Malate dehydrogenase, mitochondrial                                            | 2.8(0.2)                      | (P08249) Malate dehydrogenase, mitochondrial                                            | 4.3(0.7)                       |
| (P33198) Isocitrate dehydrogenase [NADP], mitochondrial                                 | 4.3(0.3)                      | (P54071) Isocitrate dehydrogenase [NADP], mitochondrial                                 | 7.0(1.0)                       |
| (Q148N0) 2-oxoglutarate dehydrogenase E1 component, mitochondrial                       | 2.1(0.3)                      | (Q60597) 2-oxoglutarate dehydrogenase, mitochondrial                                    | 4.1(0.4)                       |
| (P16276) Aconitate hydratase, mitochondrial                                             | 3.8(0.2)                      | (Q99K10) Aconitate hydratase, mitochondrial                                             | 4.7(0.4)                       |
| (O97580) Succinyl-CoA ligase [ADP-forming] subunit beta, mitochondrial                  | 3.9(0.1)                      | (Q9Z2I9) Succinyl-CoA ligase [ADP-forming] subunit beta, mitochondrial                  | 4.4(0.8)                       |
| (Q29551) Succinyl-CoA:3-ketoacid-coenzyme A transferase 1, mitochondrial                | 6.1(0.2)                      | (Q9D0K2) Succinyl-CoA:3-ketoacid-coenzyme A transferase 1, mitochondrial                | 4.4(0.8)                       |
| (P41563) Isocitrate dehydrogenase [NAD] subunit alpha, mitochondrial                    | 5.8(0.1)                      | (P70404) Isocitrate dehydrogenase [NAD] subunit gamma 1, mitochondrial                  | 4.9(0.9)                       |
| (P08559) Pyruvate dehydrogenase E1 component subunit alpha, somatic form, mitochondrial | 5.6(0.4)                      | (P35486) Pyruvate dehydrogenase E1 component subunit alpha, somatic form, mitochondrial | 5.1(0.6)                       |
| (P00889) Citrate synthase, mitochondrial                                                | 4.8(0.5)                      | (Q9CZU6) Citrate synthase, mitochondrial                                                | 4.1(0.8)                       |
| (P07954) Fumarate hydratase, mitochondrial                                              | 1.8(0.1)                      | (P97807) Fumarate hydratase, mitochondrial                                              | 3.9 (1.0)                      |
